# Supplementary material for: Longitudinal Assessment of Serum 25-Hydroxyvitamin D Levels during Pregnancy and Postpartum—Are the Current Recommendations for Supplementation Sufficient?
Source: MDPI journal article supplement (doi:10.3390/nu15020339), 2023-01-10
Supplement: s1 [file s1]

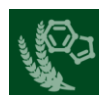

**Supplementary Table S1** Pregnancy outcomes in singleton and twin pregnancies

|                                           | singleton pregnancies<br>n=182 | twin pregnancies<br>n=49 | p-value |
|-------------------------------------------|--------------------------------|--------------------------|---------|
| GA at delivery in weeks, median (IQR)     | 39.29 (38.29–40.29)            | 36.86 (35.86–37.43)      | <0.001  |
| Live birth, n (%)                         | 181 (99.5)                     | 48 (98)                  | 0.136   |
| Stillbirth, n (%)                         | 0 (0)                          | 1 (2)                    |         |
| Neonatal death <1 week, (%)               | 1 (0.5)                        | 0 (0)                    |         |
| Small for gestational age infant 1, n (%) | 24 (13.4)                      | 18 (37.5)                | <0.001  |
| Small for gestational age infant 2, n (%) |                                | 15 (31.3)                |         |
| <i>Mode of delivery</i>                   |                                |                          | <0.001  |
| Spontaneous, n (%)                        | 92 (50.8)                      | 2 (4.1)                  |         |
| Elective caesarean, n (%)                 | 3 (1.7)                        | 1 (2)                    |         |
| Primary caesarean, n (%)                  | 51 (28.2)                      | 36 (73.5)                |         |
| Secondary caesarean, n (%)                | 17 (9.4)                       | 10 (2.4)                 |         |
| Ventouse, n (%)                           | 15 (8.3)                       | 0 (0)                    |         |
| Emergency caesarean, n (%)                | 3 (1.7)                        | 0 (0)                    |         |
| Preterm birth, n (%)                      | 17 (9.3)                       | 27 (55.1)                | <0.001  |
| HDP, n (%)                                | 8 (4.4)                        | 4 (8.2)                  | 0.29    |
| GDM, n (%)                                | 17 (9.3)                       | 4 (8.2)                  | 0.81    |
| IGDM, n (%)                               | 15 (8.2)                       | 3 (6.1)                  | 0.63    |
| PROM, n (%)                               | 19 (10.4)                      | 4 (8.2)                  | 0.64    |
| Preterm labour, n (%)                     | 9 (4.9)                        | 6 (12.2)                 | 0.06    |
| Cervical Insufficiency, n (%)             | 4 (2.2)                        | 5 (10.2)                 | 0.010   |
| Pregnancy complications, n (%)            | 47 (25.8)                      | 24 (48)                  | 0.003   |
| NICU admission infant 1, n (%)            | 8 (4.4)                        | 8 (16.3)                 | 0.004   |
| RDS infant 1, n (%)                       | 9 (4.9)                        | 9 (18.4)                 | 0.002   |
| NICU admission infant 2, n (%)            |                                | 10 (20.8)                |         |
| RDS infant 2, n (%)                       |                                | 9 (18.8)                 |         |

**Supplementary Table S2** Vitamin D deficiency in the first trimester and association with complications in twin pregnancies presented as absolute frequencies and percentages in parenthesis

|                                | Vitamin D <50 nmol/l<br>n=23 | Vitamin D >50 nmol/l<br>n= 26 | p-value |
|--------------------------------|------------------------------|-------------------------------|---------|
| Preterm birth, n (%)           | 12 (52.2)                    | 15 (57.7)                     | 0.70    |
| HDP, n (%)                     | 1 (4.3)                      | 3 (11.5)                      | 0.36    |
| GDM, n (%)                     | 2 (8.7)                      | 2 (7.7)                       | 0.90    |
| IGDM, n (%)                    | 0 (0.0)                      | 3 (11.5)                      | 0.09    |
| PROM, n (%)                    | 2 (8.7)                      | 2 (7.7)                       | 0.90    |
| PTL, n (%)                     | 3 (13.0)                     | 3 (11.5)                      | 0.87    |
| Cervical Insufficiency, n (%)  | 3 (13.0)                     | 2 (7.7)                       | 0.54    |
| Pregnancy complications, n (%) | 11 (45.8)                    | 13 (15.0)                     | 0.77    |
| NICU admission infant 1, n (%) | 3 (13.0)                     | 5 (19.2)                      | 0.56    |
| RDS infant 1, n (%)            | 4 (17.4)                     | 5 (19.2)                      | 0.87    |
| SGA infant 1, n (%)            | 11 (47.8)                    | 7 (28.0)                      | 0.156   |
| NICU admission infant 2, n (%) | 4 (17.4)                     | 6 (24.0)                      | 0.573   |
| RDS infant 2, n (%)            | 3 (13.0)                     | 6 (24.0)                      | 0.331   |
| SGA infant 2, n (%)            | 9 (39.1)                     | 6 (24.0)                      | 0.259   |
